# Supplementary material for: “Haeckelite”, a new low dimensional cousin of boron nitride for biosensing with ultra-fast recovery time: a first principles investigation
Source: Royal Society of Chemistry journal article supplement (doi:10.1039/c8tb01649f), 2018-01-01
Supplement: c8tb01649f1.pdf [file c8tb01649f1.pdf]

# “Haeckelite” a new low dimensional cousin of boron nitride for Biosensing with ultra-fast recovery time: A first principles investigation

Basant Roodhe<sup>1</sup> and Prafulla K Jha<sup>1,§</sup>

<sup>1</sup>Department of Physics, Faculty of Science, The Maharaja Sayajirao University of Baroda, Vadodara-390002,  
India

§ [prafullaj@yahoo.com](mailto:prafullaj@yahoo.com); [pk.jha-phy@msubaroda.ac.in](mailto:pk.jha-phy@msubaroda.ac.in)

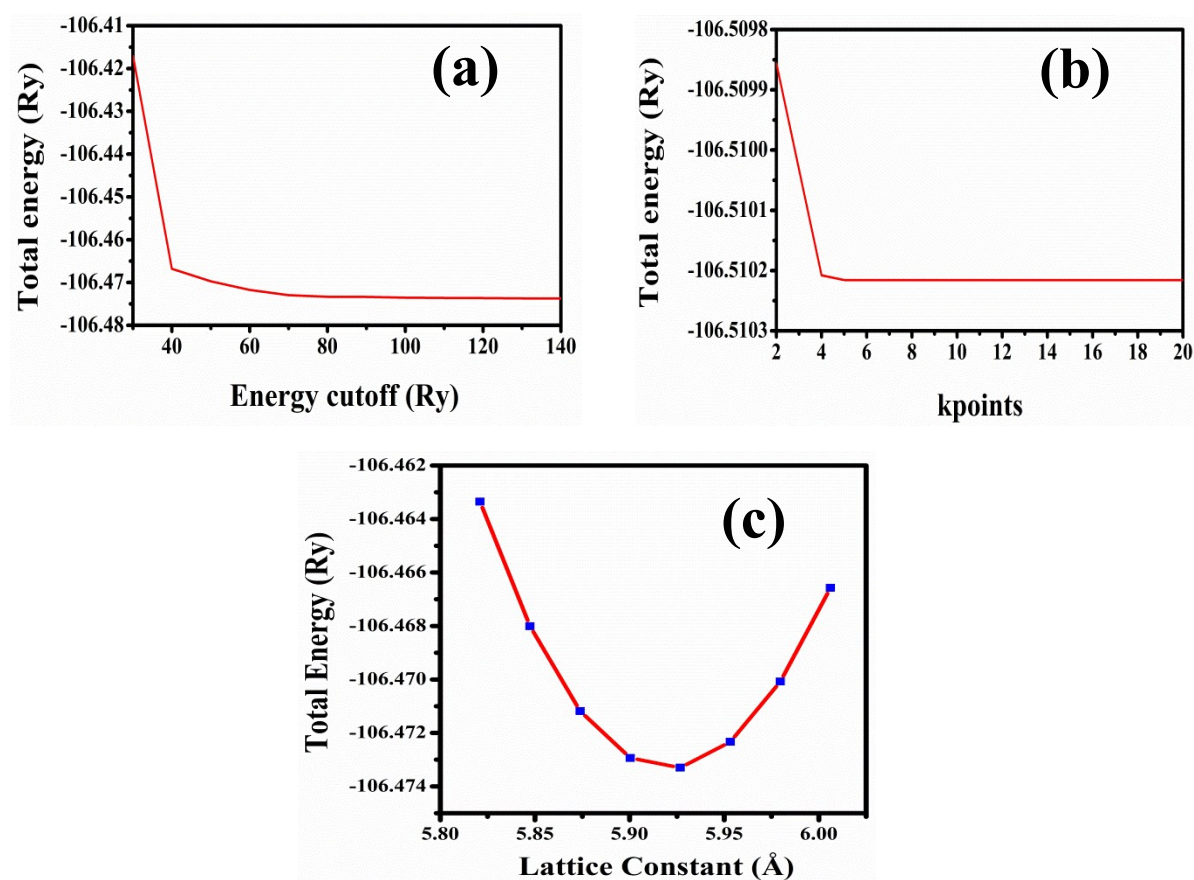

**Figure S1:** Total energy Convergence plot for haeck-BN (a) Energy cutoff (ecut), (b) K-point and (c) Energy of states (eos).

**Table S1:** Calculated total energy of nucleobase adsorbed heck-BN system. Red color represents minimum energy.

| Distance (Å)     | A                    | G                    | C                    | T                    | U                    |
|------------------|----------------------|----------------------|----------------------|----------------------|----------------------|
| 1.0              | -797.14563569        | -827.24450277        | -778.32027206        | -790.40151271        | -793.01554085        |
| 1.5              | -803.32734246        | -835.14560366        | -784.52685720        | -801.55327009        | -797.48784613        |
| 2.0              | -805.07205702        | -837.96243467        | -786.28344130        | -811.496918992       | -798.86362140        |
| 2.5              | -805.59573819        | -839.04827443        | -786.89557762        | -813.26327259        | -799.29076560        |
| <b>Optimized</b> | <b>-805.70177593</b> | <b>-839.39961317</b> | <b>-787.04842003</b> | <b>-813.72913714</b> | <b>-799.37783694</b> |
| 3.0              | -805.69647630        | -839.38631967        | -787.03703933        | -813.71807435        | -799.39073438        |
| 3.5              | -805.69071475        | -839.38548052        | -787.03216000        | -813.71031933        | -799.36672226        |
| 4.0              | -805.67720738        | -839.37047296        | -787.02507247        | -813.65860629        | -799.35612839        |

**Table S2:** Calculated total energy of nucleobase adsorbed heck-BN system with different orientation. Red color represents minimum energy.

| System   | Orientation   |               |               |                      |
|----------|---------------|---------------|---------------|----------------------|
|          | Perpendicular | Parallel      |               |                      |
|          |               | Parallel (1)  | Parallel (2)  | Parallel (3)         |
| <b>A</b> | -805.67409951 | -805.69333844 | -805.70168216 | <b>-805.70177593</b> |
| <b>G</b> | -839.36709371 | -839.37120249 | -839.39640827 | <b>-839.39961217</b> |
| <b>C</b> | -787.02532204 | -787.03926981 | -787.04579516 | <b>-787.04842003</b> |
| <b>T</b> | -813.63395282 | -813.72114341 | -813.72384597 | <b>-813.72913714</b> |
| <b>U</b> | -799.35689170 | -798.91355371 | -798.85654916 | <b>-799.37783694</b> |

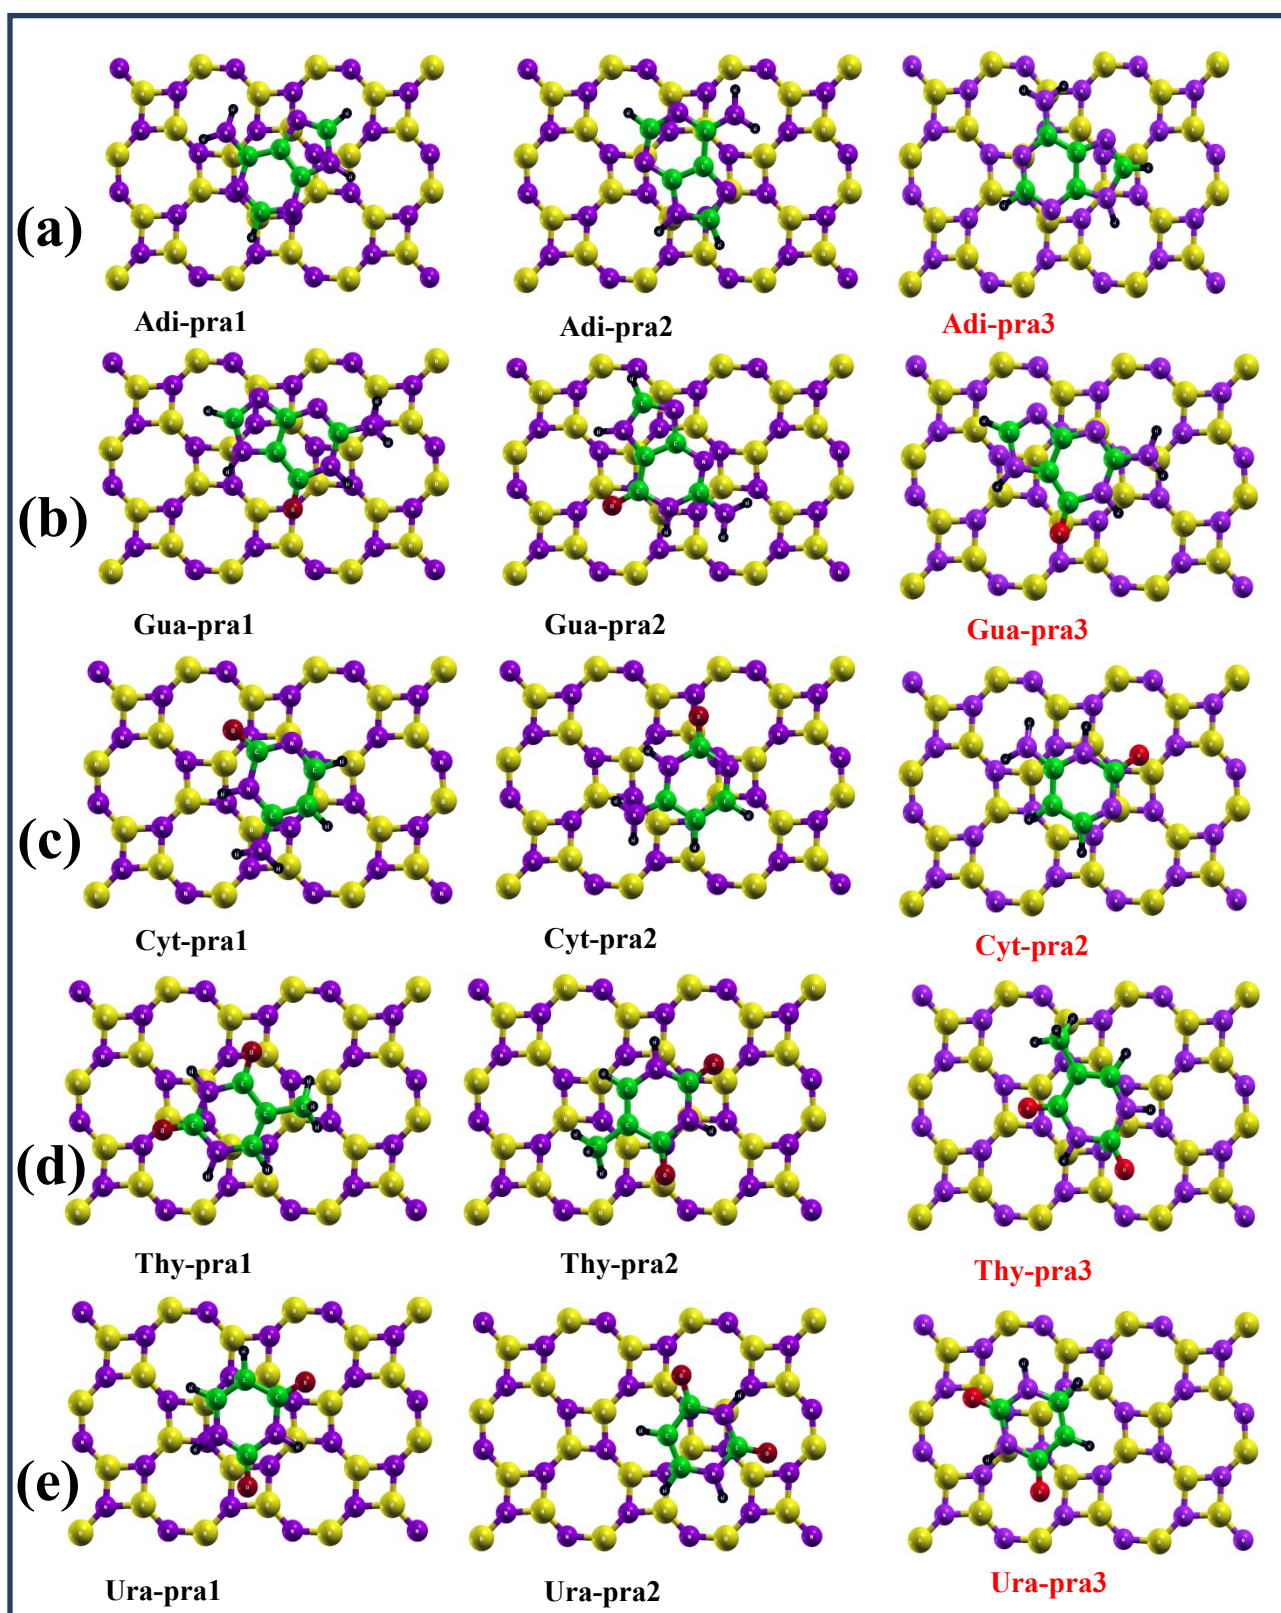

**Fig.S2.** Different parallel orientation of haeck-BN adsorbed by nucleobases (a) Adenine, (b) Cytosine, (c) Guanine, (d) Thymine, (e) Uracil.



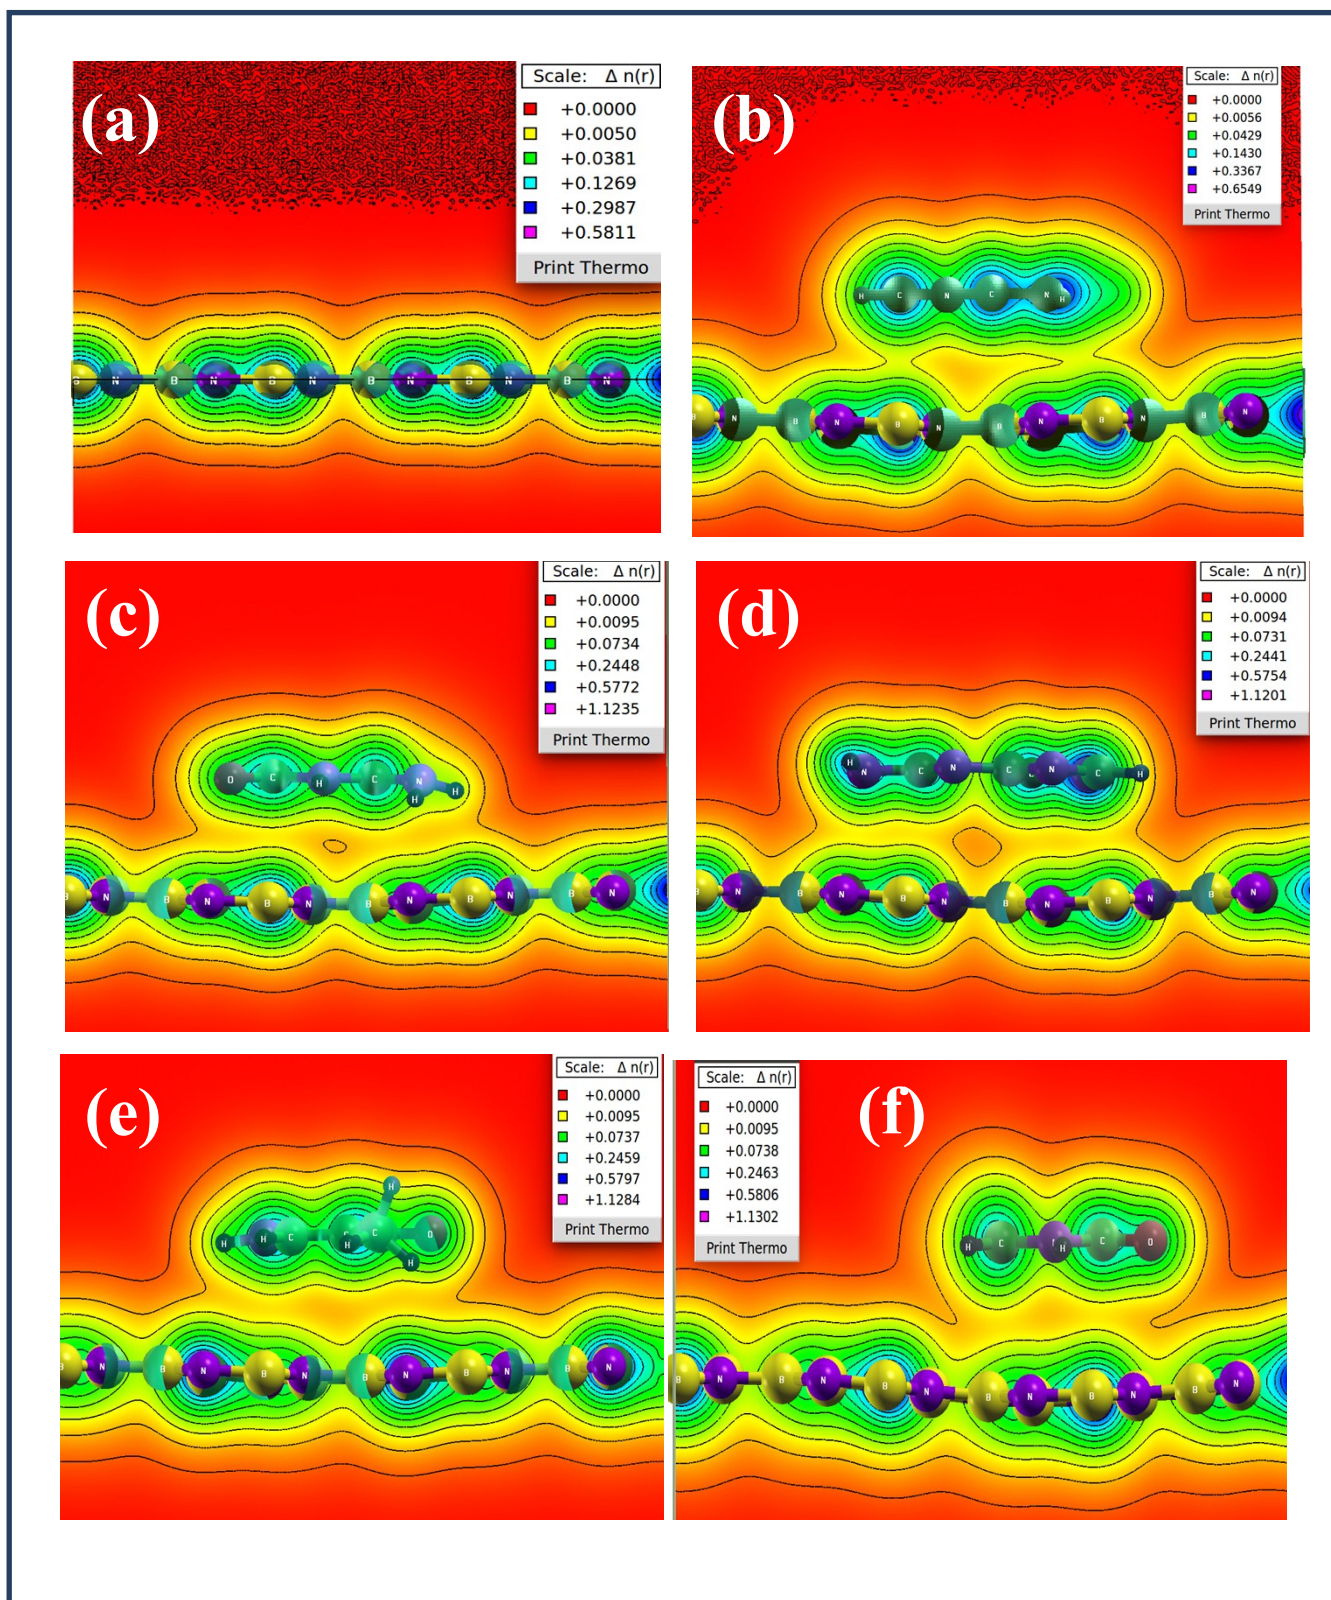

**Fig.S3.** Charge density plot of (a) haeck-BN and haeck-BN adsorb by nucleobases (b) Adenine, (c) Cytosine, (d) Guanine, (e) Thymine, (f) Uracil.

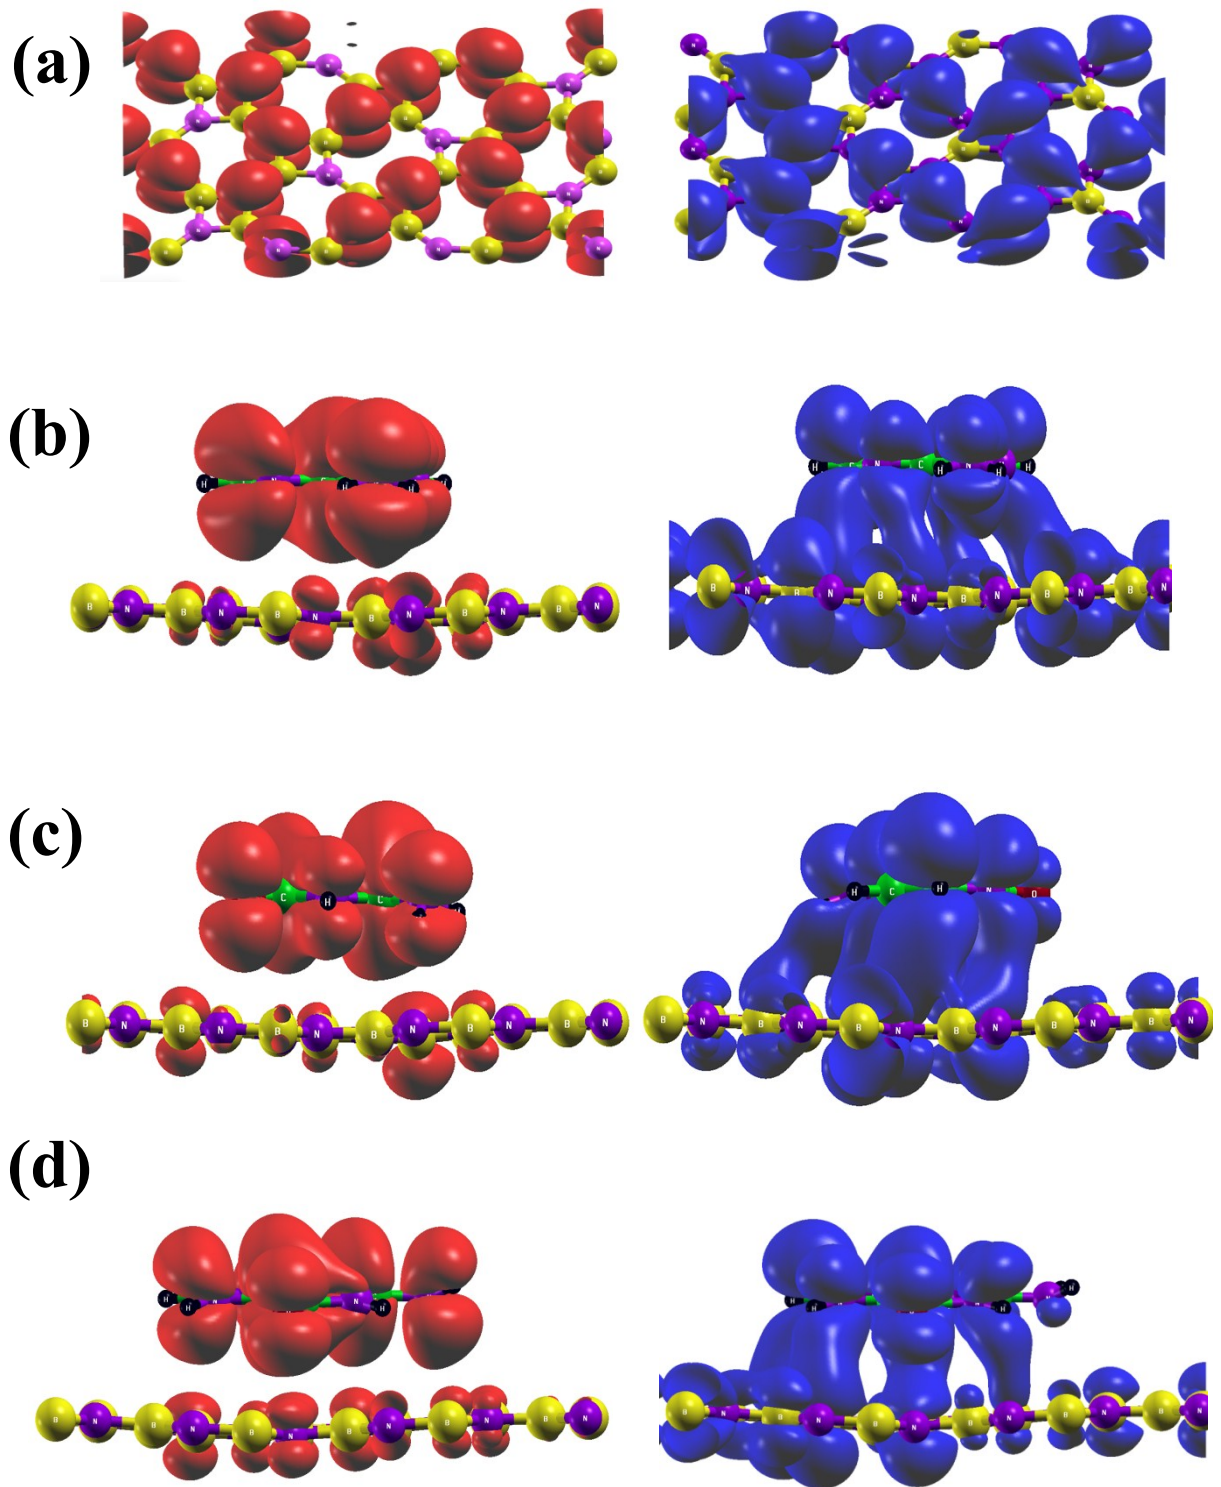



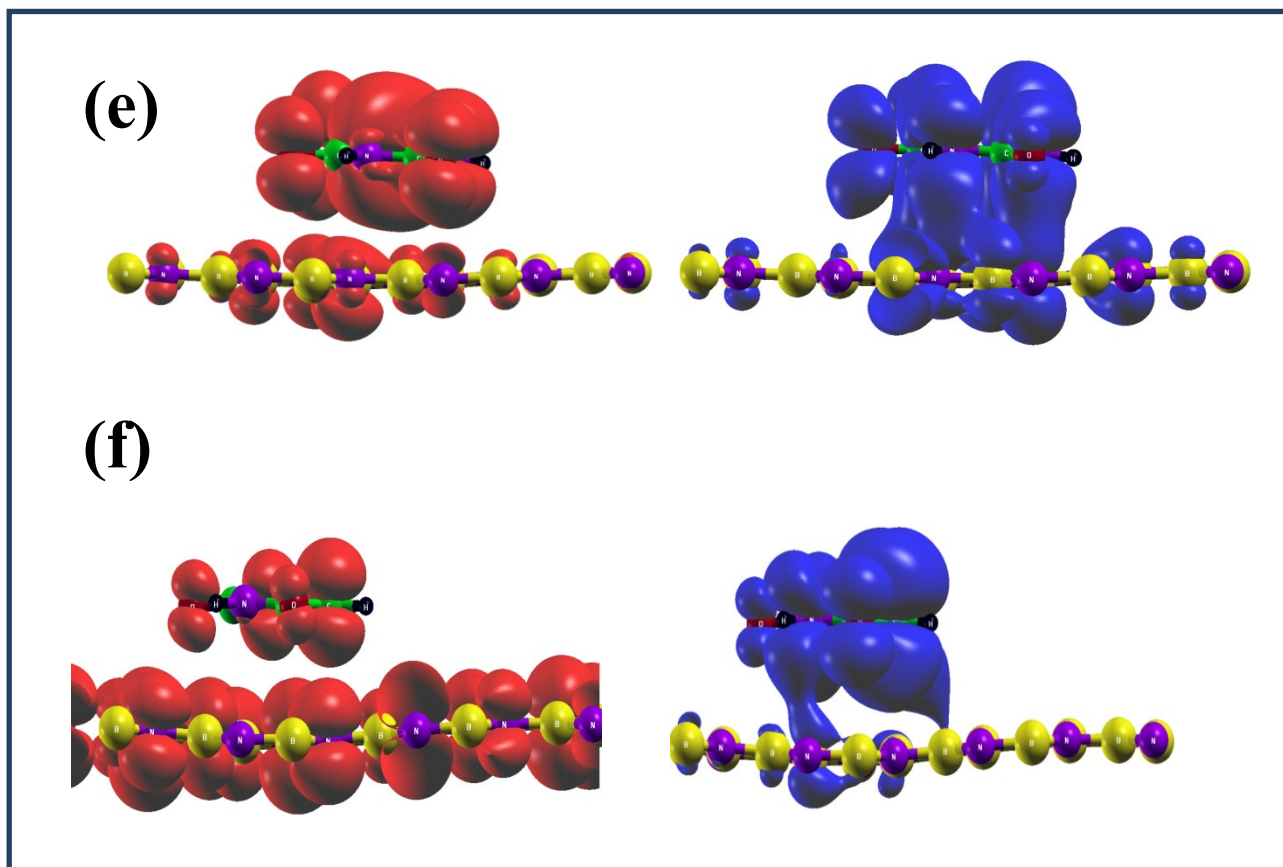

**Fig.S4.** HOMO and LUMO of (a) haeck-BN and (b-f) nucleobase adsorbed haeck-BN system; (b) Adenine, (c) Cytosine, (d) Guanine, (e) Thymine, (f) Uracil.

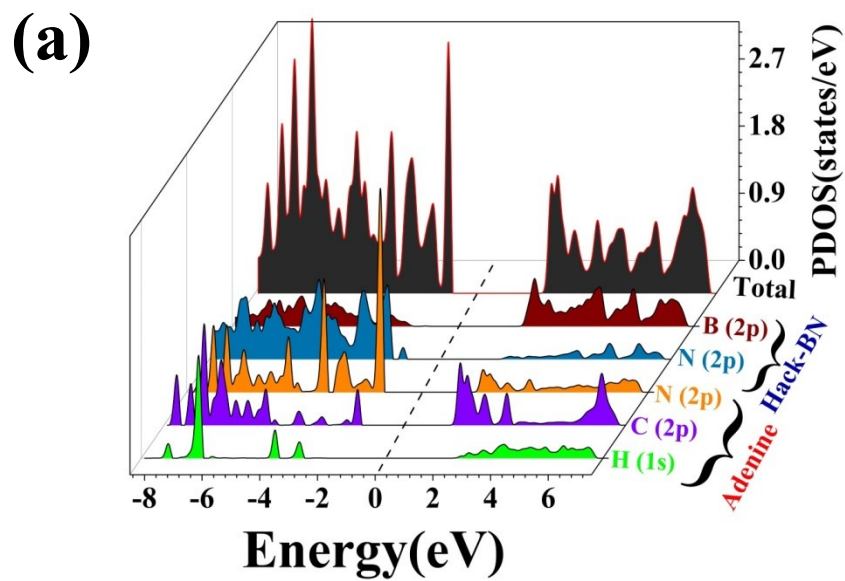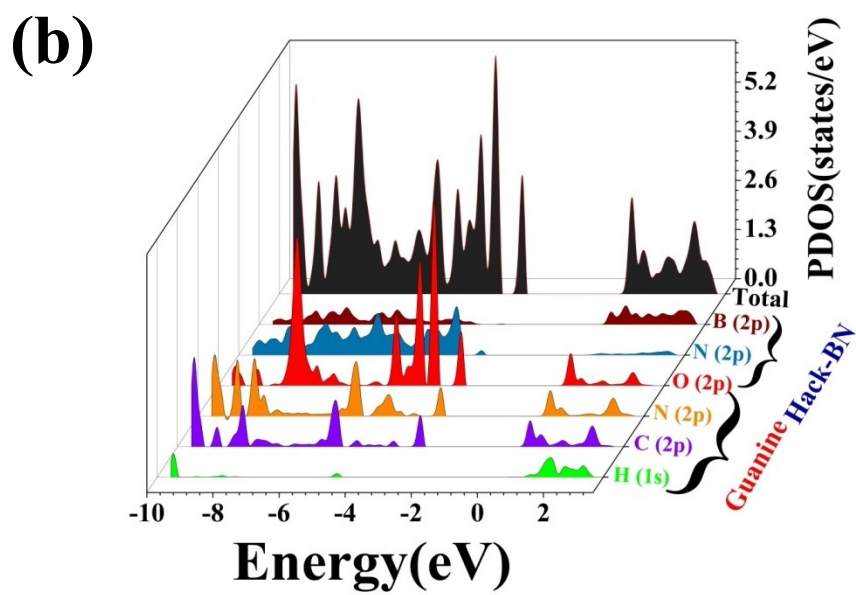



(c)

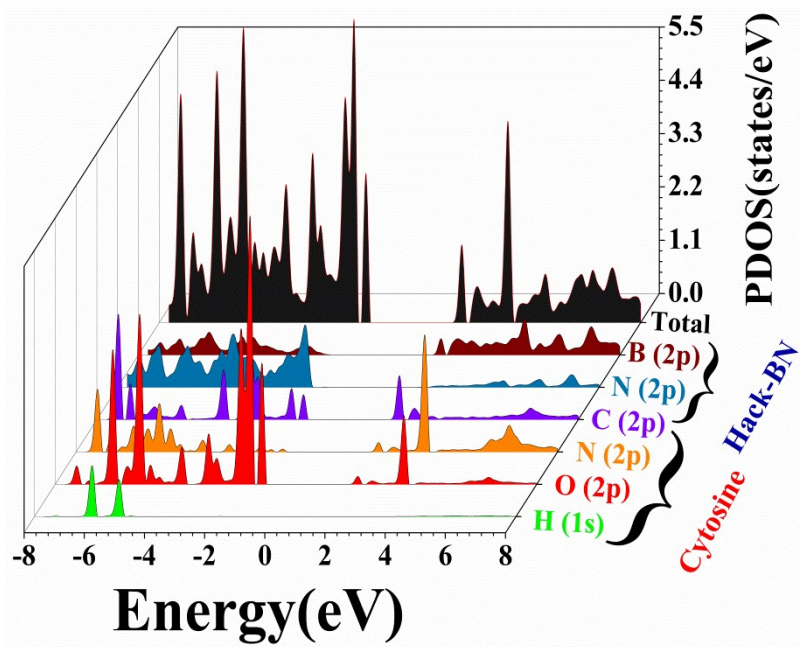

(d)

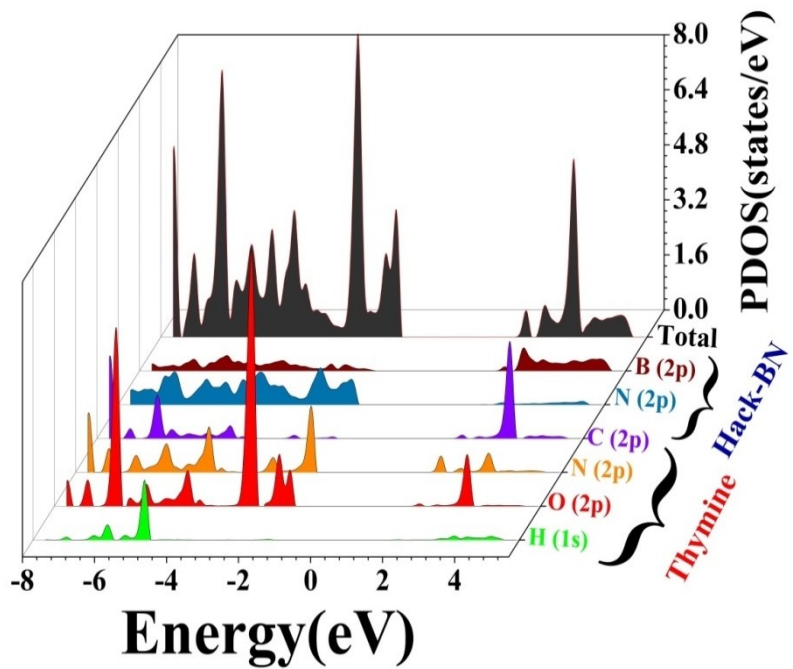

(e)

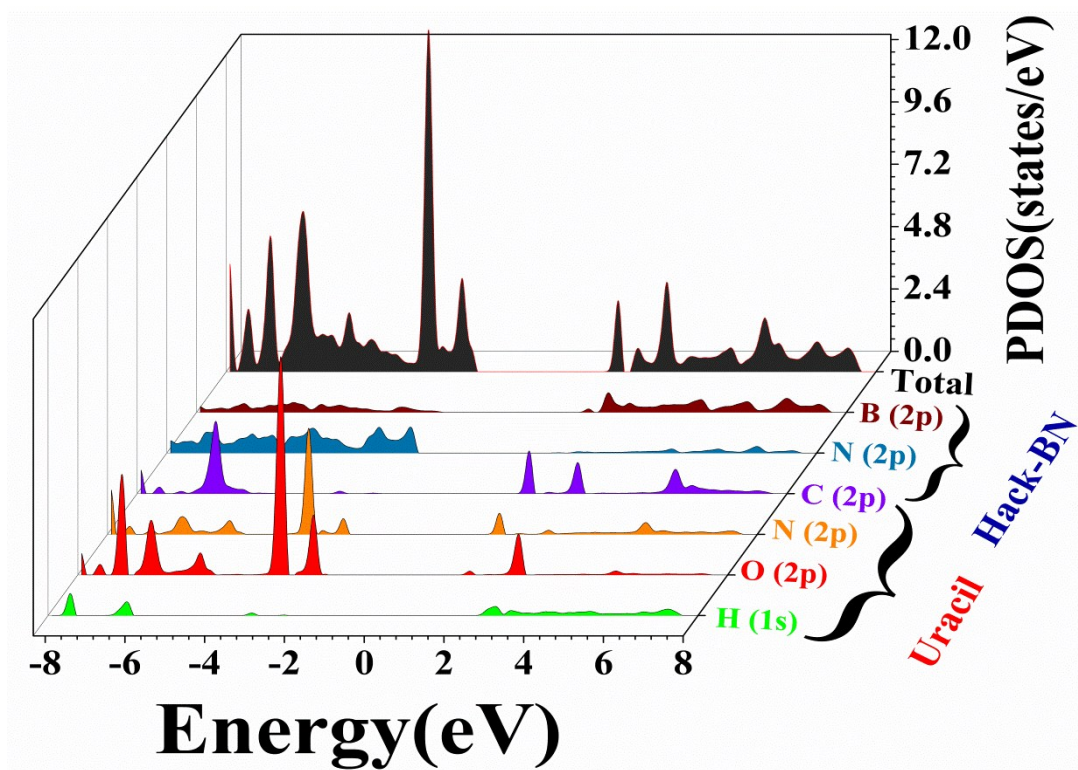

**Figure S5:** Partial density of states (PDOS) plot of nucleobases adsorbed haecK-BN system (a) Adenine, (b) Guanine, (c) Cytosine, (d) Thymine and (e) Uracil.

(a)

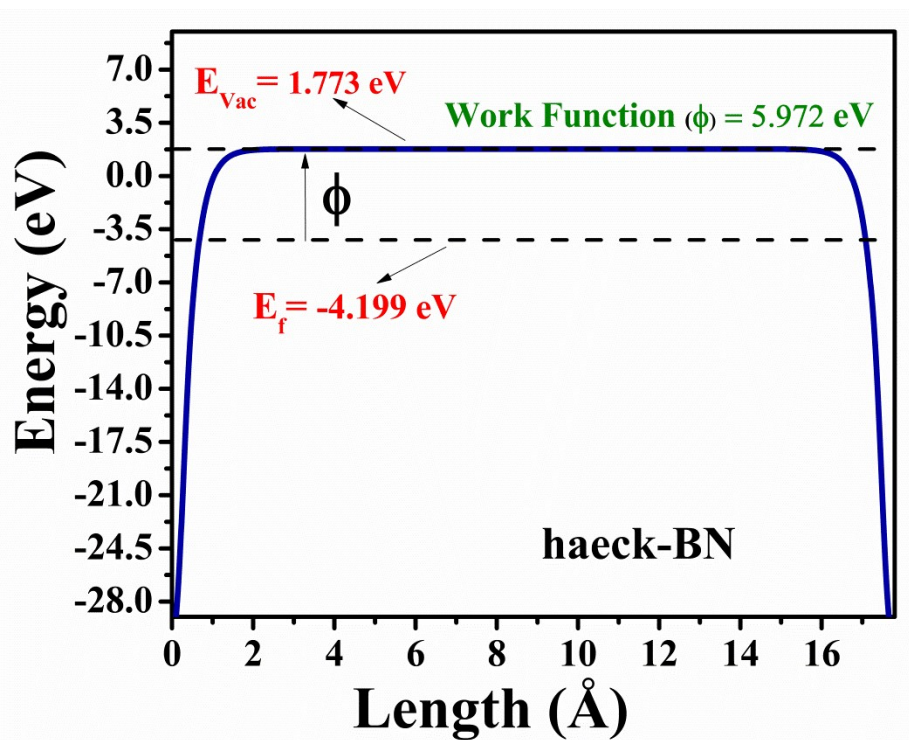

(b)

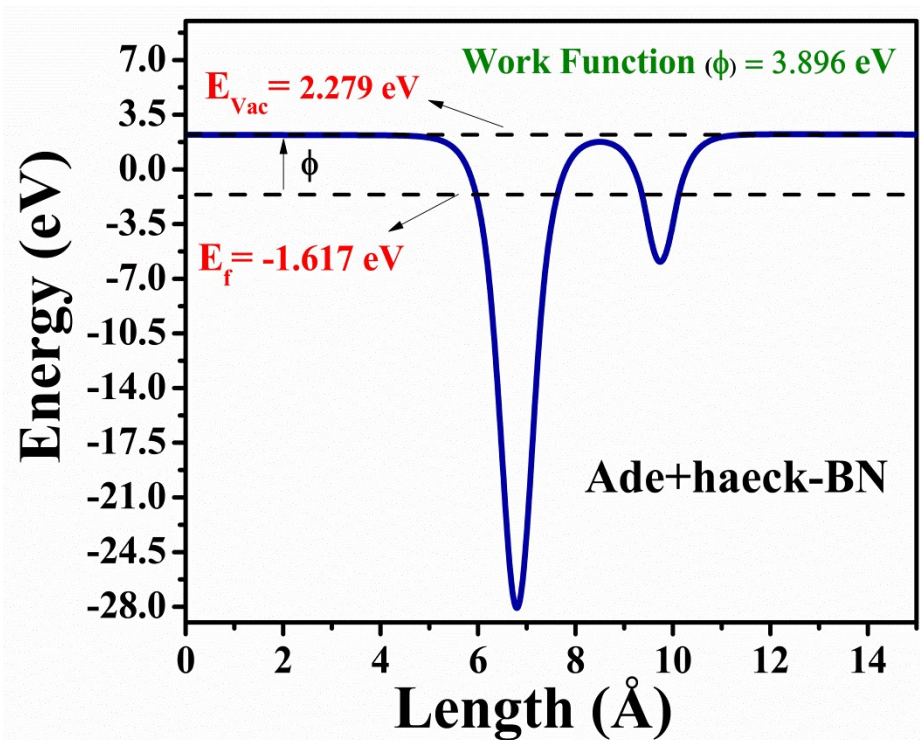



(c)

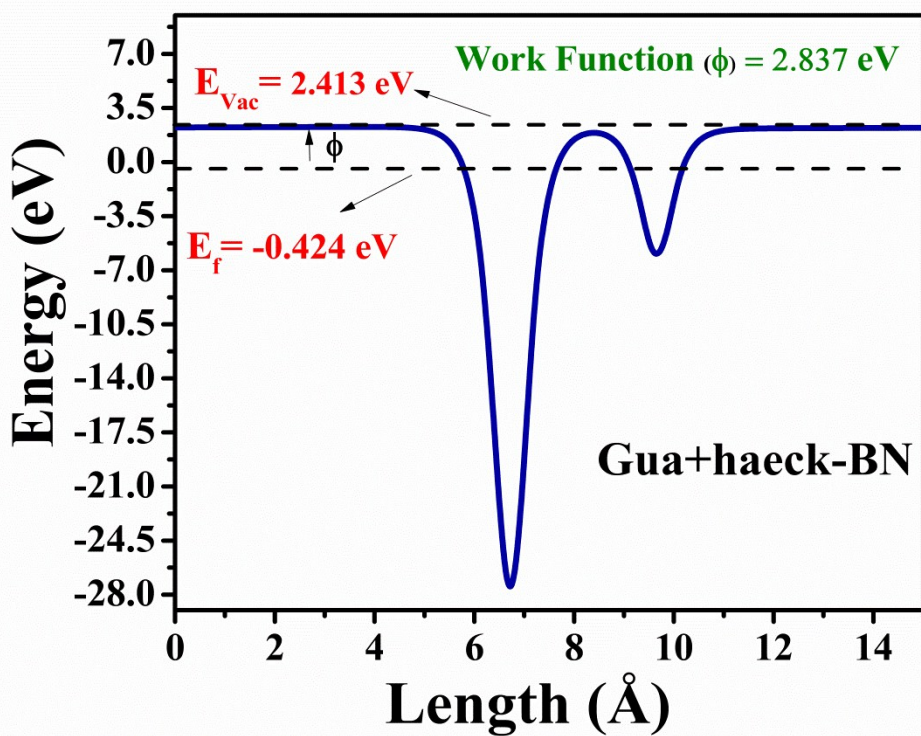

(d)

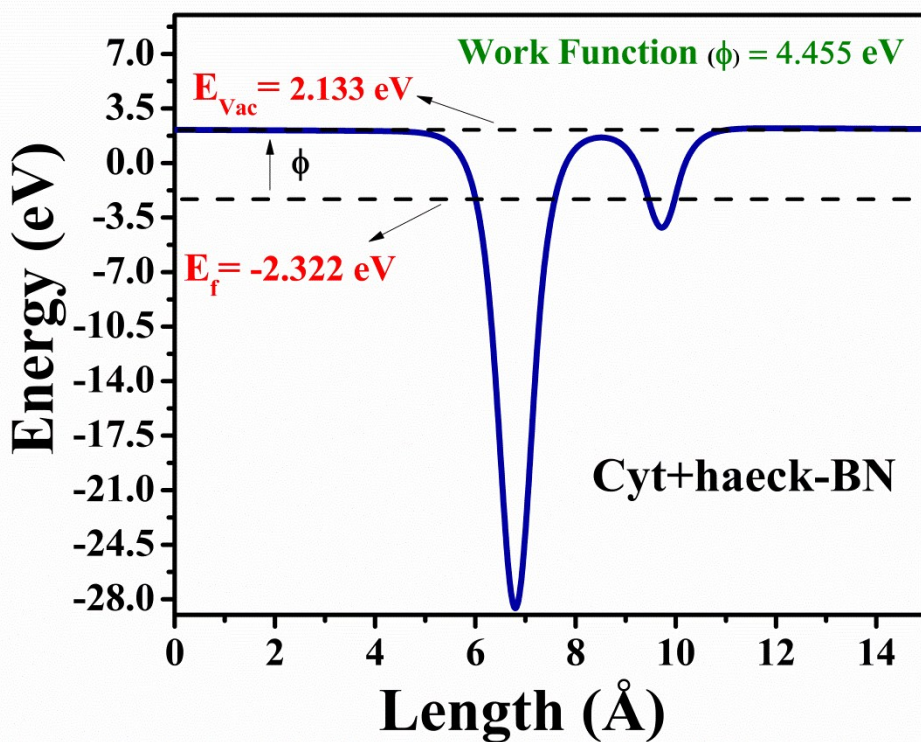



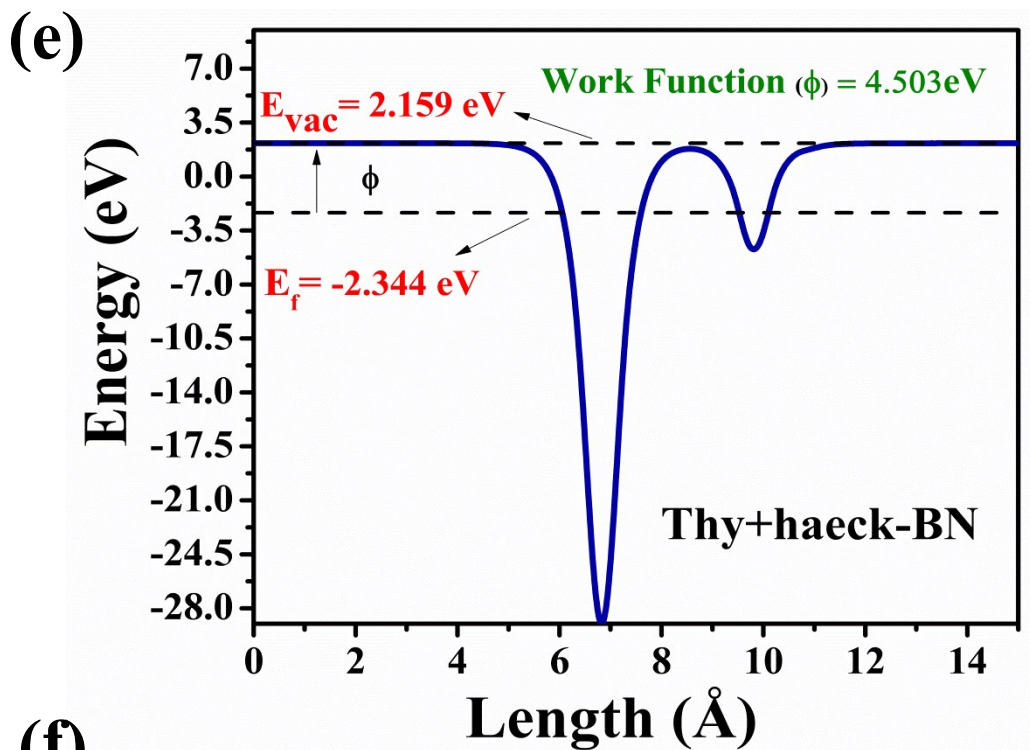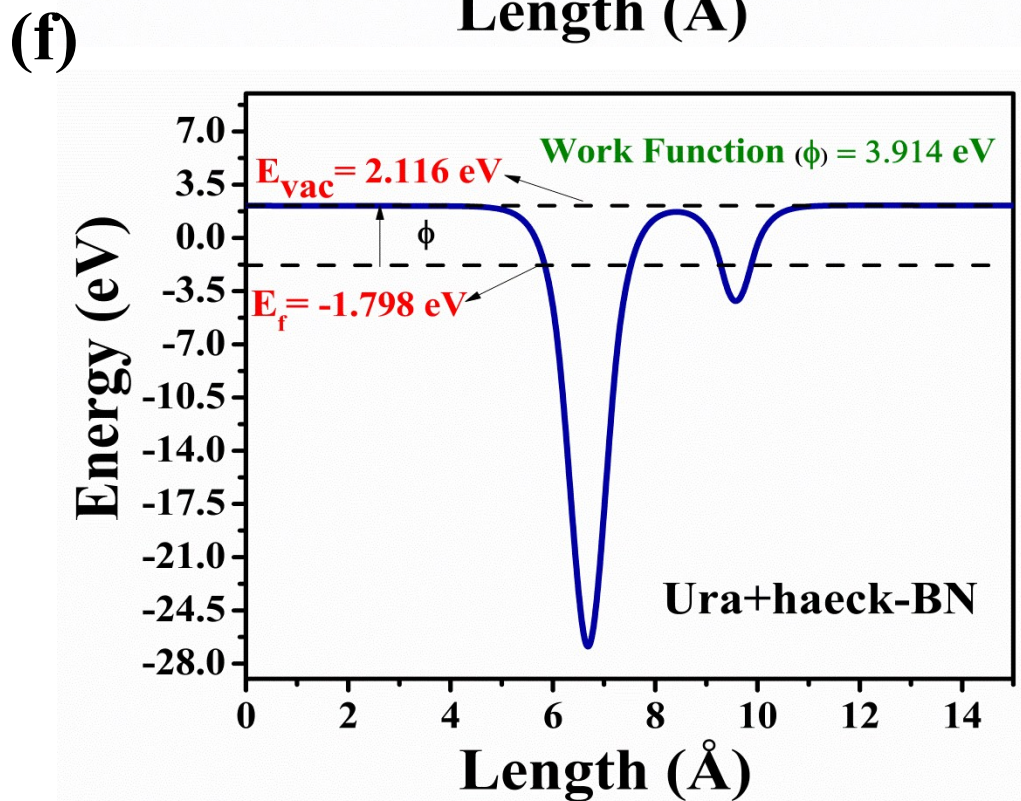

**Figure S6:** Work function plot of pristine and nucleobases adsorbed haeck-BN system (a) Pristine, (b) Adenine, (c) Guanine, (d) Cytosine, (e) Thymine and (f) Uracil.
